# Supplementary material for: Geographic variation in the utilisation of specialist healthcare for patients with substance use disorders in Norway: a population-based registry study
Source: Res Health Serv Reg. 2026 Jan 5;5:1. doi: 10.1007/s43999-025-00084-y (PMC12770024; doi:10.1007/s43999-025-00084-y)
Supplement: Supplementary file 2 — Supplementary Material 2 [file 43999_2025_84_MOESM2_ESM.xlsx]

## Sheet: Ark2
	Definitions
	Region	Patients are reported in the region with highst weighted activity in the case of more than one region.
	F10 alcohol	Unique patients in all five years
	F11 ex F1122 opium	Unique patients in all five years
	F12 cannabis	Unique patients in all five years
	F13-F19 ex F17 rest	Unique patients in all five years
	Totalt	Unike patients across all four diagnosis groups, if more than 30 within institution
	Out-patient consultations	Episode start and end same date
	Admissions	In case of more than one spell is reported, without gap in dates, they are collapsed to one admission.
	Bed-days	Sum of difference "in-date" and "out-date" for all episodes.
	Length of stay (LOS)	Difference "in-date" and "out-date"
	Substabce use disorders: Service use in 2017-2021 per institusjon, contract type, diagnosis and service type
	Institution name	Contract type (last if more then one)	Region	F10 alcohol	F11 ex F1122 opioid	F12 cannabis	F13-F19 all other substances ex F17	Totalt	Consultations	Admissions	Bed-days	LOS
	Name			Patients	Patients	Patients	Patients	Unique patients	Sum	Sum	Sum	Average
	Akershus universitetssykehus HF	Offentlege	Helse Sør-Øst	2065	684	740	1433	4184	69877	3139	46422	14.7888
	ALFA KURS OG BEHANDLINGSSENTER AS	Kjøpsavtale	Helse Sør-Øst	83	12	10	51	145	0	149	14106	94.6711
	A-SENTERET MARIDALSVEIEN	Kjøpsavtale	Helse Sør-Øst	882	39	81	199	1057	27227	434	64046	147.571
	BERGENSKLINIKKEN AS	Oppdragsavtale	Helse Vest	666	144	137	464	1270	10703	638	17943	28.1238
	BETANIA MALVIK REHABILITERING	Kjøpsavtale	Helse Sør-Øst	0	0	12	27	54	0	70	10145	144.929
	BETANIEN SPESIALISTPOLIKLINIKK	Oppdragsavtale	Helse Vest	31	0	22	52	102	594	38	869	22.8684
	BETANIEN SYKEHUS AS	Oppdragsavtale	Helse Vest	12	0	0	21	41	151	21	461	21.9524
	BLÅ KORS BORGESTADKLINIKKEN SA AVD BORGESTAD	Kjøpsavtale	Helse Sør-Øst	784	74	144	303	1243	11996	1004	95241	94.8616
	BLÅ KORS HAUGALAND A-SENTER	Kjøpsavtale	Helse Vest	346	71	80	196	648	13971	247	7373	29.8502
	BLÅ KORS KLINIKK HAUGALAND AS	Kjøpsavtale	Helse Vest	464	112	100	267	871	22215	11	382	34.7273
	BLÅ KORS KLINIKK INNLANDET	Kjøpsavtale	Helse Sør-Øst	193	0	13	33	219	49	333	50736	152.36
	BLÅ KORS KLINIKK LADE SA	Kjøpsavtale	Helse Midt	1077	328	393	748	1920	26026	2772	91060	32.8499
	BLÅ KORS KLINIKK LOLAND AS	Kjøpsavtale	Helse Sør-Øst	29	0	11	80	127	0	163	25609	157.11
	BLÅ KORS KLINIKK OSLO SENTRUM	Kjøpsavtale	Helse Sør-Øst	307	0	52	51	390	11154	0	0	0
	BLÅ KORS KLINIKK OSLO VEST	Kjøpsavtale	Helse Sør-Øst	36	15	19	72	122	0	214	30864	144.224
	BLÅ KORS KLINIKK RUS OG AVHENGIGHET TJELDSUND AS AVD FJELLDAL	Kjøpsavtale	Helse Nord	390	125	71	128	671	15	1502	76289	50.7916
	CARE SERVICE AS	Kjøpsavtale	Helse Sør-Øst	22	0	0	0	32	0	34	7460	219.412
	CRUX KALFARET BEHANDLINGSSENTER	Kjøpsavtale	Helse Vest	76	36	107	179	296	6510	360	43746	121.517
	CRUX VERKSGATA BEHANDLINGSSENTER	Kjøpsavtale	Helse Vest	35	21	68	153	210	2392	220	27760	126.182
	DIAKONHJEMMET SYKEHUS	Oppdragsavtale	Helse Sør-Øst	454	40	185	589	1062	14533	160	1213	7.58125
	DIAKONHJEMMET SYKEHUS AS	Oppdragsavtale	Helse Sør-Øst	784	75	293	614	1528	27331	230	1679	7.3
	FEKJÆR PSYKIATRISKE SENTER INSTITUSJON PSYKISK HELSEVERN	Kjøpsavtale	Helse Sør-Øst	40	0	11	42	102	1364	91	8170	89.7802
	Finnmarksykehuset HF BUPA	Offentlege	Helse Nord	333	29	69	223	602	4845	546	18162	33.2637
	FRELSESARMEENS RUSOMSORG AVD BEHANDLINGSTUNET FETSUND	Kjøpsavtale	Helse Sør-Øst	36	44	0	53	140	0	185	30650	165.676
	FRELSESARMEENS RUSOMSORG AVD STAVANGER	Kjøpsavtale	Helse Vest	158	54	53	250	404	3393	472	34612	73.3305
	Helgelandssykehuset HF BUPA	Offentlege	Helse Nord	273	104	85	213	563	7651	331	6631	20.0332
	Helse Bergen HF	Offentlege	Helse Vest	1739	521	716	1377	3698	62923	2982	80573	27.0198
	Helse Fonna HF	Offentlege	Helse Vest	447	207	166	459	1115	11713	725	15934	21.9779
	Helse Fonna, Haugesund sjukehus	Offentlege	Helse Vest	326	143	134	388	887	7596	639	12349	19.3255
	Helse Førde HF	Offentlege	Helse Vest	314	52	58	130	513	5131	448	13696	30.5714
	HELSE MØRE OG ROMSDAL HF ÅLESUND BEHANDLINGSSENTER	Offentlege	Helse Midt	355	127	146	607	938	14098	1121	38359	34.2186
	Helse Stavanger HF	Offentlege	Helse Vest	532	122	478	912	1813	31297	1072	34519	32.2006
	INCOGNITO KLINIKK	Kjøpsavtale	Helse Sør-Øst	781	55	60	188	997	14122	512	41194	80.457
	KOA PSYKISK HELSE AS	Kjøpsavtale	Helse Nord	42	0	0	49	99	0	105	16919	161.133
	LOVISENBERG DIAKONALE SYKEHUS AS	Oppdragsavtale	Helse Sør-Øst	614	75	437	572	1550	22245	525	4139	7.88381
	MESTRINGSHUSENE BOLKESJØ AS	Kjøpsavtale	Helse Sør-Øst	90	18	18	75	183	0	362	20235	55.8978
	MODUM BAD PSYKISK HELSEVERN	Kjøpsavtale	Helse Sør-Øst	28	0	10	36	76	574	14	147	10.5
	Nic Waals institutt Lovisenberg	Oppdragsavtale	Helse Sør-Øst	463	76	365	457	1249	17694	332	3272	9.85542
	NKS JÆREN DISTRIKTSPSYKIATRISKE AS	Oppdragsavtale	Helse Vest	104	0	32	132	261	2361	256	2572	10.0469
	NKS OLAVIKEN ALDERSPSYKIATRISKE SYKEHUS AS AVD SYKEHUS	Oppdragsavtale	Helse Vest	41	0	0	16	58	212	21	841	40.0476
	NKS, Kvamsgrindkollektivet	Kjøpsavtale	Helse Midt	37	0	67	64	146	3741	136	28899	212.493
	Nordlandssykehuset HF BUPA	Offentlege	Helse Nord	618	129	187	457	1228	12578	1182	17710	14.9831
	ORIGOSENTERET	Kjøpsavtale	Helse Sør-Øst	40	50	53	166	256	1056	229	68526	299.24
	Oslo Universitetssykehus HF	Offentlege	Helse Sør-Øst	1984	1024	669	1046	4195	43422	4618	59020	12.7804
	RIISBY BEHANDLINGSSENTER AVD RIISBY SØNDRE	Kjøpsavtale	Helse Sør-Øst	165	15	15	38	228	57	445	56836	127.721
	ROGALAND A-SENTER	Kjøpsavtale	Helse Vest	1478	399	289	748	2462	29197	2049	54534	26.6149
	SAMTUN AS	Kjøpsavtale	Helse Sør-Øst	56	22	106	149	223	652	217	53656	247.263
	SOLLI SYKEHUS AS	Oppdragsavtale	Helse Vest	81	12	30	65	182	1130	62	839	13.5323
	SOM--Akershus Universitetssykehus	Offentlege	Helse Sør-Øst	1294	434	496	901	2818	38419	2025	33812	16.6973
	SOM--ÅLESUND SJUKEHUS	Offentlege	Helse Midt	671	56	172	837	1373	16303	2399	38939	16.2313
	SOM---FØRDE SENTRALSJUKEHUS	Offentlege	Helse Vest	304	51	42	129	500	4636	392	11837	30.1964
	SOM--Haukeland sykehus	Offentlege	Helse Vest	696	370	458	848	2075	29024	1201	41176	34.2848
	SOM--KRISTIANSUND SYKEHUS	Offentlege	Helse Midt	131	21	56	118	299	3619	54	957	17.7222
	SOM--MOLDE SJUKEHUS	Offentlege	Helse Midt	333	118	130	437	831	15824	541	18786	34.7246
	SOM--SYKEHUSET LEVANGER	Offentlege	Helse Midt	586	99	248	351	1090	16277	730	13995	19.1712
	SOM--SYKEHUSET NAMSOS	Offentlege	Helse Midt	188	34	58	86	326	5253	135	909	6.73333
	SOM--VOLDA SJUKEHUS	Offentlege	Helse Midt	65	0	17	43	123	1509	24	361	15.0417
	Sørlandet sykehus HF	Offentlege	Helse Sør-Øst	1233	307	697	1002	2817	61773	2694	58750	21.8077
	SØRLANDET SYKEHUS, KRISTIANSAND	Offentlege	Helse Sør-Øst	1011	455	620	877	2581	44633	1793	40129	22.3809
	ST OLAVS HOSPITAL HF RUS OG AVHENGIGHET RUS KLOSTERGATA	Offentlege	Helse Midt	413	324	138	277	979	14524	543	17880	32.9282
	ST. OLAVS HOSPITAL HF	Offentlege	Helse Midt	1012	242	342	547	1926	30286	1520	22450	14.7697
	St. Olavs Hospital HF St.Olavs Hospital	Offentlege	Helse Midt	1023	313	457	639	2137	31049	1648	21759	13.2033
	Stavanger UnivSH BUP avd	Offentlege	Helse Vest	395	118	350	706	1429	22807	836	28696	34.3254
	STIFTELSEN FINNMARKSKOLLEKTIVET	Kjøpsavtale	Helse Nord	26	0	0	109	136	0	173	24350	140.751
	STIFTELSEN FOSSUM-KOLLEKTIVET AVD VALNESFJORD	Kjøpsavtale	Helse Sør-Øst	70	19	140	197	335	0	445	100767	226.443
	STIFTELSEN FREDHEIM	Kjøpsavtale	Helse Sør-Øst	29	11	0	50	89	0	96	26917	280.385
	STIFTELSEN KARMSUND ABR-SENTER	Kjøpsavtale	Helse Vest	30	24	42	135	189	169	342	22032	64.4211
	STIFTELSEN KVINNEKOLLEKTIVET ARKEN	Kjøpsavtale	Helse Sør-Øst	34	0	12	40	84	0	93	15141	162.806
	STIFTELSEN MANIFESTSENTERET PSYKISK HELSEVERN	Kjøpsavtale	Helse Sør-Øst	33	15	11	41	91	13	93	11725	126.075		0.732955
	STIFTELSEN PHOENIX	Kjøpsavtale	Helse Sør-Øst	11	0	11	41	70	114	71	19342	272.423		0.521739
	STIFTELSEN RENÅVANGEN	Kjøpsavtale	Helse Sør-Øst	47	22	58	136	195	42	273	50199	183.879
	STIFTELSEN RUSBEHANDLING	Oppdragsavtale	Helse Vest	944	219	324	908	1876	26352	1637	55664	34.0037
	STIFTELSEN SOLLIAKOLLEKTIVET AVD RAUFOSS	Kjøpsavtale	Helse Sør-Øst	42	19	35	75	160	706	193	34446	178.477
	STIFTELSEN TRASOPPKLINIKKEN	Kjøpsavtale	Helse Sør-Øst	1468	94	117	265	1732	28606	1434	68759	47.9491
	STIFTELSEN VALDRESKLINIKKEN	Kjøpsavtale	Helse Sør-Øst	196	0	0	45	239	0	1021	39263	38.4554
	Sykehuset i Vestfold	Offentlege	Helse Sør-Øst	833	229	391	609	1778	23452	1148	28849	25.1298
	Sykehuset i Vestfold, Tønsberg	Offentlege	Helse Sør-Øst	1062	300	442	870	2258	46190	1635	31325	19.159
	Sykehuset Innlandet HF	Offentlege	Helse Sør-Øst	1341	296	469	783	2544	39573	1514	30245	19.9769
	SYKEHUSET INNLANDET HF, HAMAR	Offentlege	Helse Sør-Øst	1059	287	402	622	2117	27888	1109	25249	22.7674
	Sykehuset Østfold HF	Offentlege	Helse Sør-Øst	1486	402	590	1398	3453	67139	2271	32674	14.3875
	Sykehuset Østfold HF BUPA	Offentlege	Helse Sør-Øst	1099	317	525	977	2614	39810	1501	23742	15.8175
	Sykehuset Telemark HF	Offentlege	Helse Sør-Øst	541	175	312	606	1413	17416	1352	12342	9.1287
	Sykehuset Telemark HF BUPA	Offentlege	Helse Sør-Øst	387	91	271	394	1015	11612	703	5985	8.51351
	TYRILI STIFINNERTEAM	Kjøpsavtale	Helse Sør-Øst	196	233	247	792	1331	24562	1341	236816	176.597
	ULLEVÅL UNIVERSITETSSYKEHUS	Offentlege	Helse Sør-Øst	1511	828	470	874	3239	29438	3244	40893	12.6057
	UNICARE 12TRINN AS	Kjøpsavtale	Helse Vest	204	38	27	132	326	15	645	47851	74.1876
	Universitetssykehuset Nord-Norge HF	Offentlege	Helse Nord	798	252	197	551	1586	16448	2409	58493	24.281
	UNN Tromsø	Offentlege	Helse Nord	600	164	158	430	1222	11666	1458	36898	25.3073
	VANGSETER AS	Kjøpsavtale	Helse Sør-Øst	64	0	0	0	64	165	67	3710	55.3731
	VESLELIEN	Kjøpsavtale	Helse Sør-Øst	72	49	45	155	271	57	416	69064	166.019
	Vestre Viken HF	Offentlege	Helse Sør-Øst	1472	548	464	888	3072	37508	2398	43039	17.9479
	Vestre Viken HF BUP	Offentlege	Helse Sør-Øst	1124	472	424	714	2492	27260	1464	32860	22.4454
	VITALIS HELSE KRAGERØ AS	Kjøpsavtale	Helse Sør-Øst	69	20	20	51	159	0	164	34330	209.329
	VOSS DPS NKS BJØRKELI AS	Oppdragsavtale	Helse Vest	35	0	0	36	78	458	47	815	17.3404
